# Supplementary material for: In vivo engineered extracellular matrix scaffolds with instructive niches for oriented tissue regeneration
Source: PubMed Central journal article supplement (PMC6789018; doi:10.1038/s41467-019-12545-3), 2019-10-11
Supplement: 41467_2019_12545_MOESM3_ESM.pdf [file 41467_2019_12545_MOESM3_ESM.pdf]

## **Description of Additional Supplementary Files**

File Name: Supplementary Movie 1

Description: Video of microCT dynamic scanning of representative membranous ECM-C scaffolds

File Name: Supplementary Movie 2

Description: Video of microCT dynamic scanning of representative control membranous scaffolds

File Name: Supplementary Movie 3

Description: Video of microCT dynamic scanning of representative ECM-C nerve scaffolds

File Name: Supplementary Movie 4

Description: Video of microCT dynamic scanning of representative control nerve scaffolds

File Name: Supplementary Movie 5

Description: Video of microCT dynamic scanning of representative ECM-C vascular scaffolds

File Name: Supplementary Movie 6

Description: Video of microCT dynamic scanning of representative control vascular scaffolds

File Name: Supplementary Movie 7

Description: Doppler ultrasound showing synchronous pulsation of ECM-C guided neoartery.

File Name: Supplementary Movie 8

Description: Video of ECM-C guided neoartery integration with the host artery
