# Supplementary material for: In vivo engineered extracellular matrix scaffolds with instructive niches for oriented tissue regeneration
Source: Nat Commun. 2019 Oct 11;10:4620. doi: 10.1038/s41467-019-12545-3 (PMC6789018; doi:10.1038/s41467-019-12545-3)
Supplement: Supplementary file 1 — Supplementary Information [file 41467_2019_12545_MOESM1_ESM.pdf]

## **Supplementary Information**

*In vivo* engineered extracellular matrix scaffolds with instructive niches for oriented tissue regeneration

Meifeng Zhu, Wen Li et al.

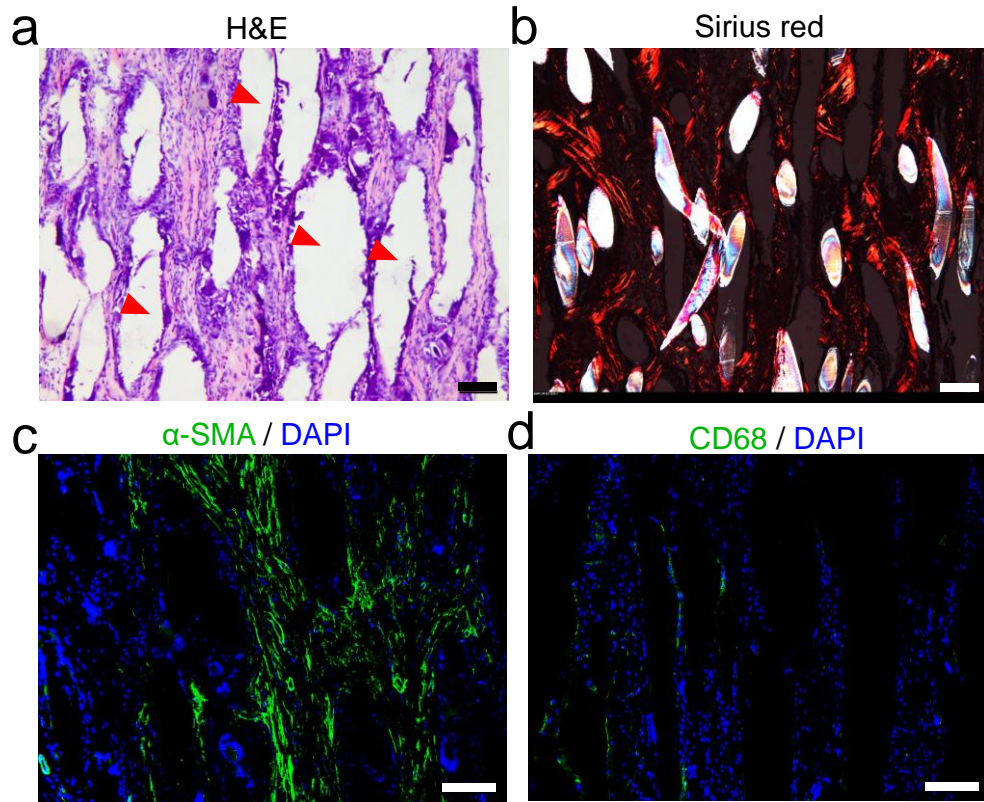

**Supplementary Figure 1** Cellularization of PCL templates after 4-week subcutaneous implantation. **a**, H&E staining of the cross-sections of cellularized PCL templates showed that the void gaps among the aligned microfibers were fully occupied by cells and cell-secreted ECM. Red triangles indicate the position of the PCL fibers. **b**, Sirius red staining of the cross-sections showed the distribution and arrangement of collagen fibers within cellularized PCL templates. PCL fibers are white. **c**, **d**, Immunofluorescence staining of the cross-sections showed that cells within the void gaps of aligned microfibers were mostly positive for  $\alpha$ -SMA with only a few positive for CD68. Scale bars: 100  $\mu$ m.

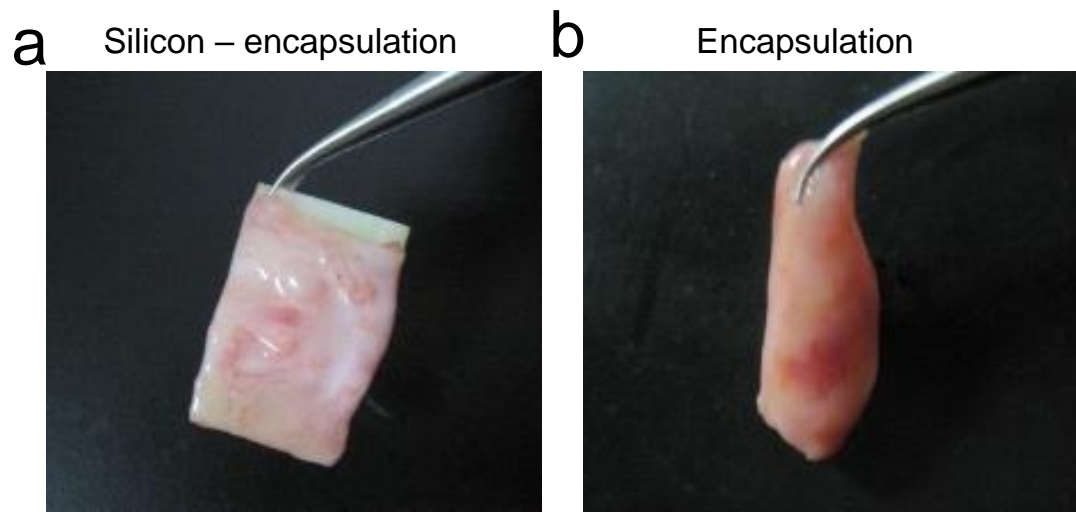

**Supplementary Figure 2** Morphology of tissue capsule around a silicone sheet after 4-week subcutaneous implantation. **a, b**, Tissue capsule can not maintain their original shape after detachment from the silicone sheet.

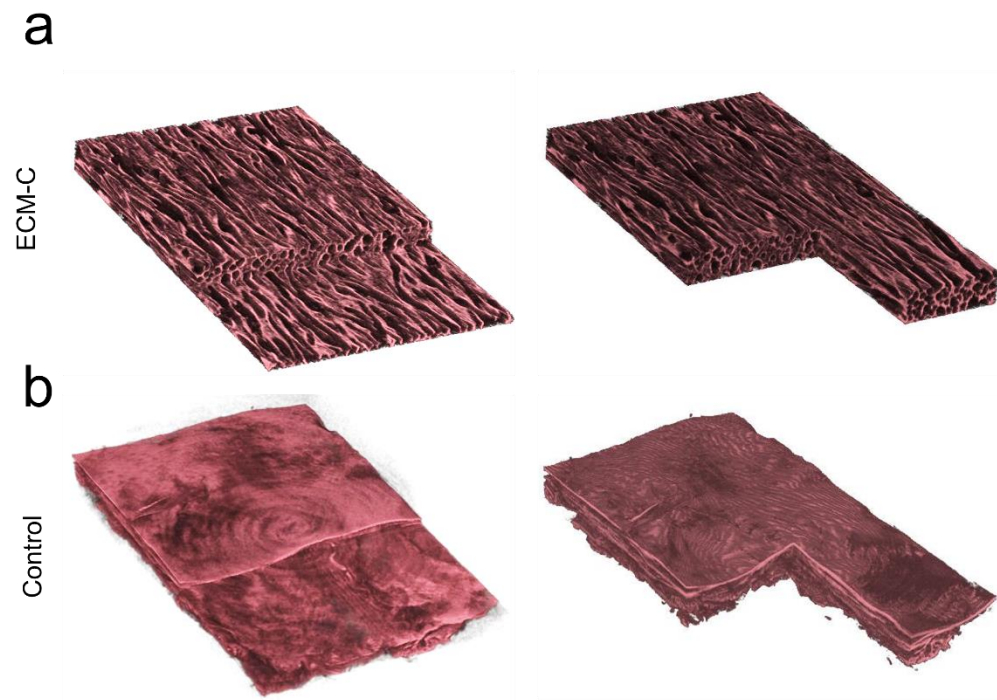

**Supplementary Figure 3** Characterization of the 3D Structure of ECM-C and control scaffolds. **a, b**, MicroCT reconstructed image showed the macro and micro structure of ECM-C and control scaffolds at different cutting positions.

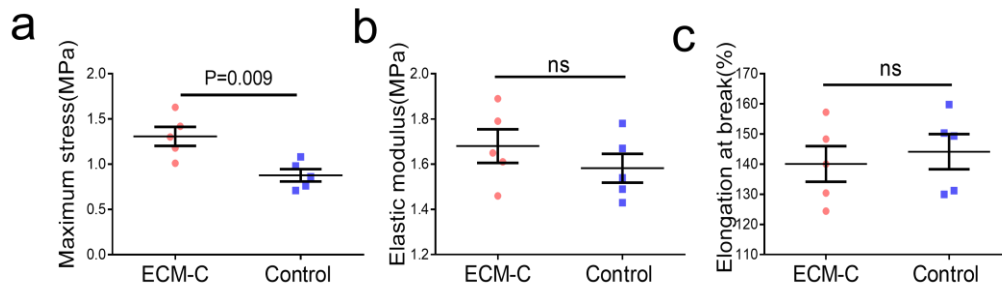

**Supplementary Figure 4** Mechanical properties of the control and ECM-C scaffolds.

**a, b, c,** Mechanical properties of the ECM-C and control scaffolds including maximum stress, elastic modulus and elongation at break ( $n = 5$ ). Statistical analysis (ns = no significance). Bar heights and error bars represent means  $\pm$  s.e.m. (t-test).

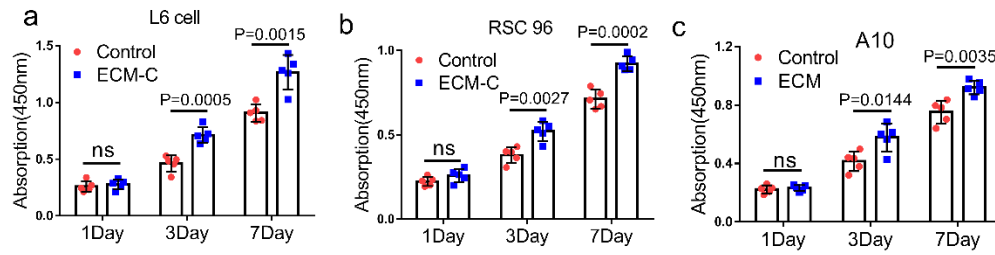

**Supplementary Figure 5** Cell proliferation of L6, RSC 96 and A10 on the control and ECM-C scaffolds. **a, b, c**, CCK-8 assay showed the proliferation of L6 and RSC96 cells cultured on control and ECM-C scaffolds (  $n = 5$  ). Statistical analysis (ns = no significance). Bar heights and error bars represent means  $\pm$  s.e.m. (t-test).

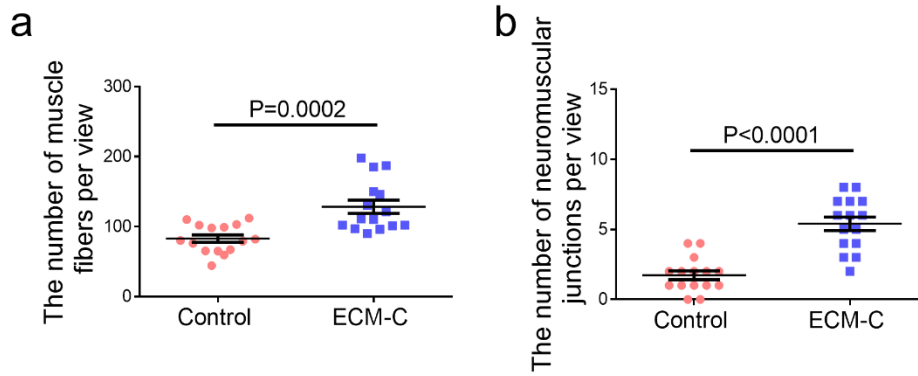

**Supplementary Figure 6** Quantification of muscle fibers and neuromuscular junctions in regenerated muscles by control and ECM-C scaffolds. **a**, the number of neo-muscle fibres presented in the control and ECM-C groups; **b**, the number of neuromuscular junctions formed in the control and ECM-C groups (  $n = 15$  ).  $n=5$  rats for each group. Bar heights and error bars represent means  $\pm$  s.e.m. (t-test)

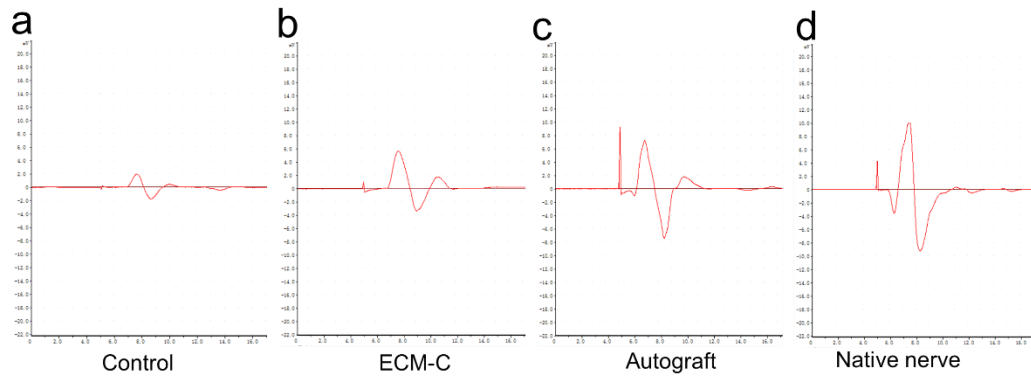

**Supplementary Figure 7** Wave patterns of CMAP. **a, b, c, d**, Representative wave pattern images of control, ECM-C, autografts and native nerve groups.

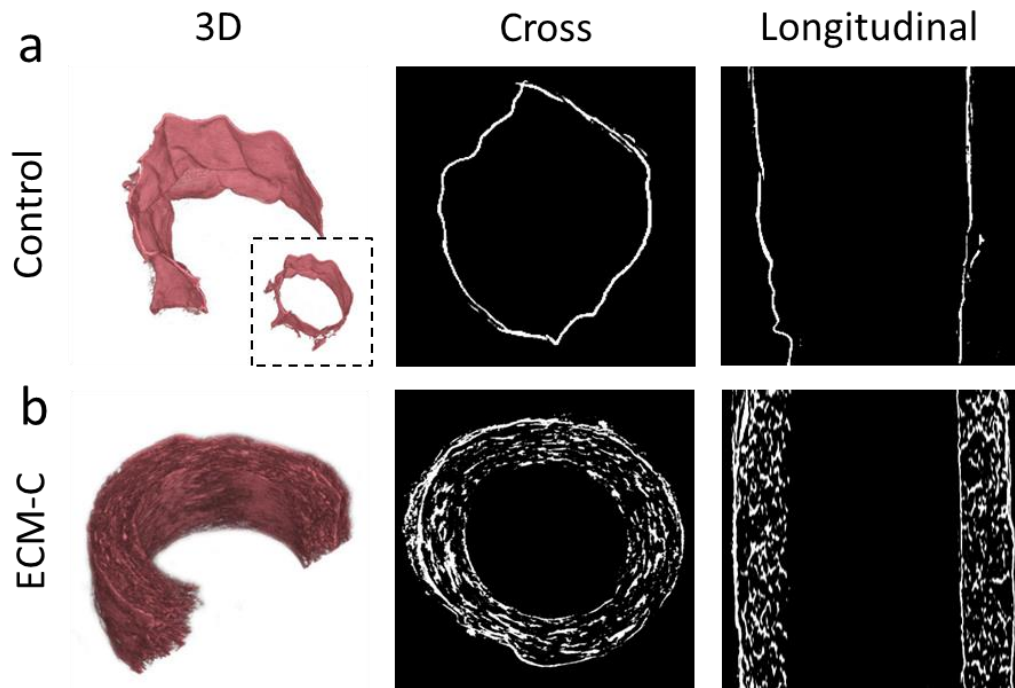

**Supplementary Figure 8** Characterization of the 3D and 2D Structure of vascular ECM-C and control scaffolds. **a, b**, MicroCT reconstructed image showed the macro and micro structure of vascular ECM-C and control scaffolds at different cutting positions. Inset in a: macroscopic view of control scaffold.

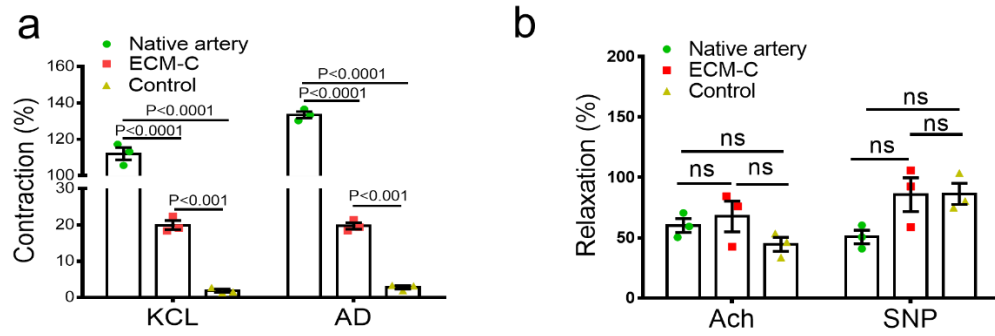

**Supplementary Figure 9** Vascular function assessment in the explanted ECM-C and control scaffolds and native artery. **a**, **b**, Constriction rate in response to vasoconstrictors including KCL and adrenaline, and relaxation rate in response to the endothelial-specific activator acetylcholine (Ach) and sodium nitroprusside (SNP) vasodilators in the explanted control, ECM-C scaffolds and native artery at 3 months. The explanted scaffolds were pre-constricted with adrenaline. n=3 rats for each group. Statistical analysis (ns = no significance). Bar heights and error bars represent means  $\pm$  s.e.m. (ANOVA).

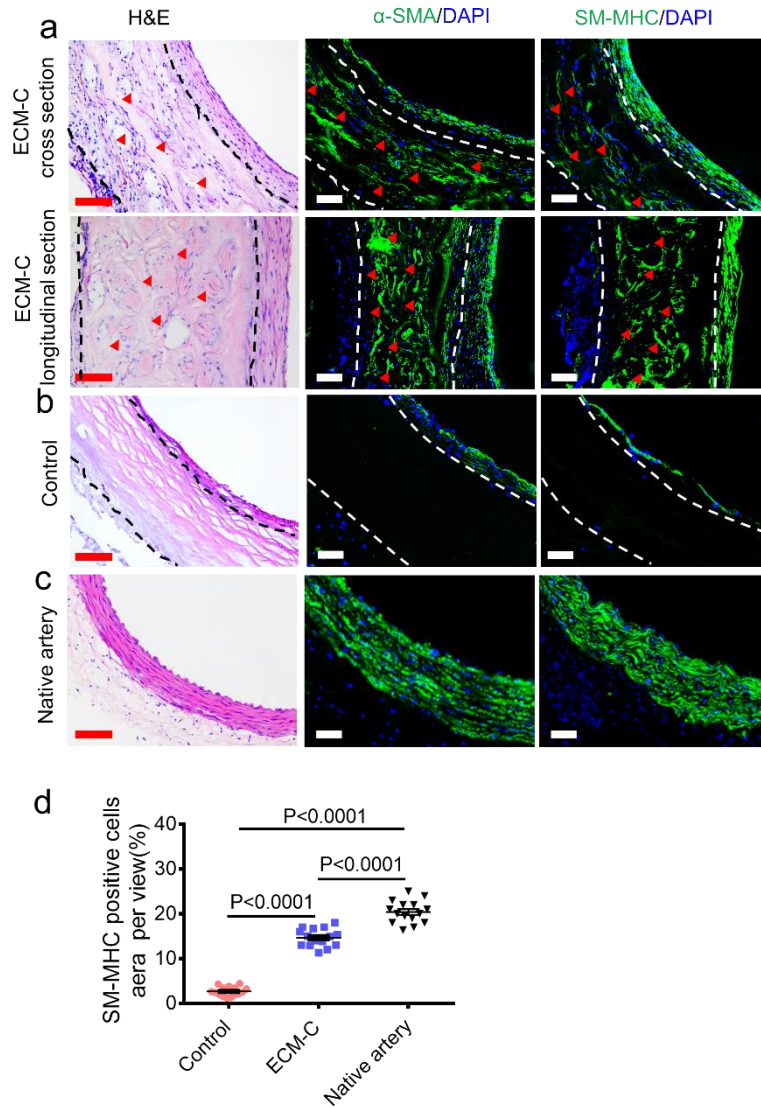

**Supplementary Figure 10** VSMC regeneration and distribution in ECM-C, control scaffolds and native artery. **a, b, c**, H&E staining showing distribution of vascular cells, and immunofluorescence staining showing the distribution of  $\alpha$ -SMA and SM-MHC positive cells (green) in control, ECM-C scaffolds and native artery. Red triangle represents the regenerated VSMC within the microchannels. Dotted lines indicate the boarder of scaffolds. **d**, SM-MHC positive cells area per view in different scaffolds (n=15). Bar heights and error bars represent means  $\pm$  s.e.m. (ANOVA). Statistical analysis is shown as, \*\*\*\*p<0.0001. Scale bars: (c- f), 100  $\mu$ m.

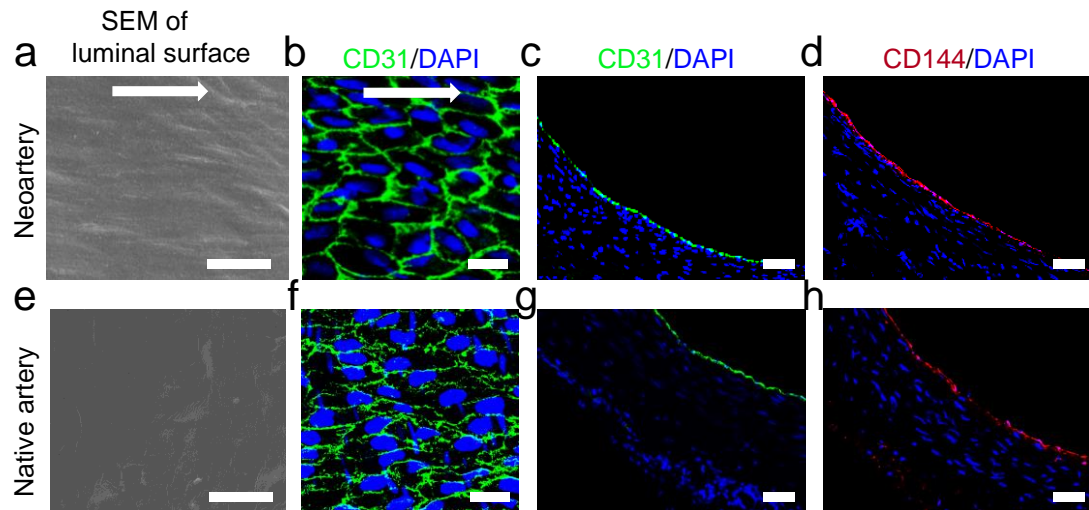

**Supplementary Figure 11** Endothelialization within the neoartery and native artery at 3 months. **a, e**, SEM images of the luminal surface covered by cobblestone-like cells. **b, f**, En face view of the luminal surface stained with CD31 antibody showing endothelial cells with orientation parallel to the direction of blood flow (white arrow). **c, d, g, h**, The monolayer cells in the lumen surface stained for CD31 (green) and CD144 (red). The cell nuclei are stained by DAPI (blue). Scale bar: (a, e) 20  $\mu\text{m}$ ; (b, f,) 25  $\mu\text{m}$ ; (c, d, g, h) 50  $\mu\text{m}$ .

| Primers       | Forward sequence<br>(5'-3')  | Reverse sequence<br>(5'-3')   | GenBank<br>accession No. |
|---------------|------------------------------|-------------------------------|--------------------------|
| MHC           | GTGCCAATGACGACCTGAAGG<br>AG  | CTGGTTGATGAGGCTGGTGTTT<br>TG  | XM_017599642.1           |
| Myogenin      | GCAGTGCCATCCAGTACATTG<br>AGC | GGAAGGTGACAGACATATCCTC<br>CAC | NM017115.2               |
| Krox20        | CCACCTCTACTCTCCACCACC<br>AC  | TGGCGGCGATAAGAATGCTGAA<br>G   | U78102.1                 |
| NCAM          | TTCAGTGACGACAGTTCGGAG<br>C   | TGCGAAGACCTTGAGGTGGAT         | NM_031521.1              |
| $\alpha$ -SMA | GCACCACTCCTTCTATAACG         | CAGCCTGAATAGCCACATAC          | NM_031004                |
| SM-MHC        | GGAGCCAAGGAGAAGATGAG         | CTGAAGGACGGATGATACTACC        | NM_001170600.1           |
| NGF           | TGATCGGCGTACAGGCAGA          | GAGGGCTGTGTCAAGGGAAT          | XM_006233053.2           |
| GAPDH         | AGGTCGGTGTGAACGGATTTG        | TGTAGACCATGTAGTTGAGGTC<br>A   | NG_028301.2              |

**Supplementary Table 1** Primer sequences of the genes for qPCR analyses
